# Supplementary material
Source: PubMed Central journal article supplement (PMC5896329)

Supplement Figure 1

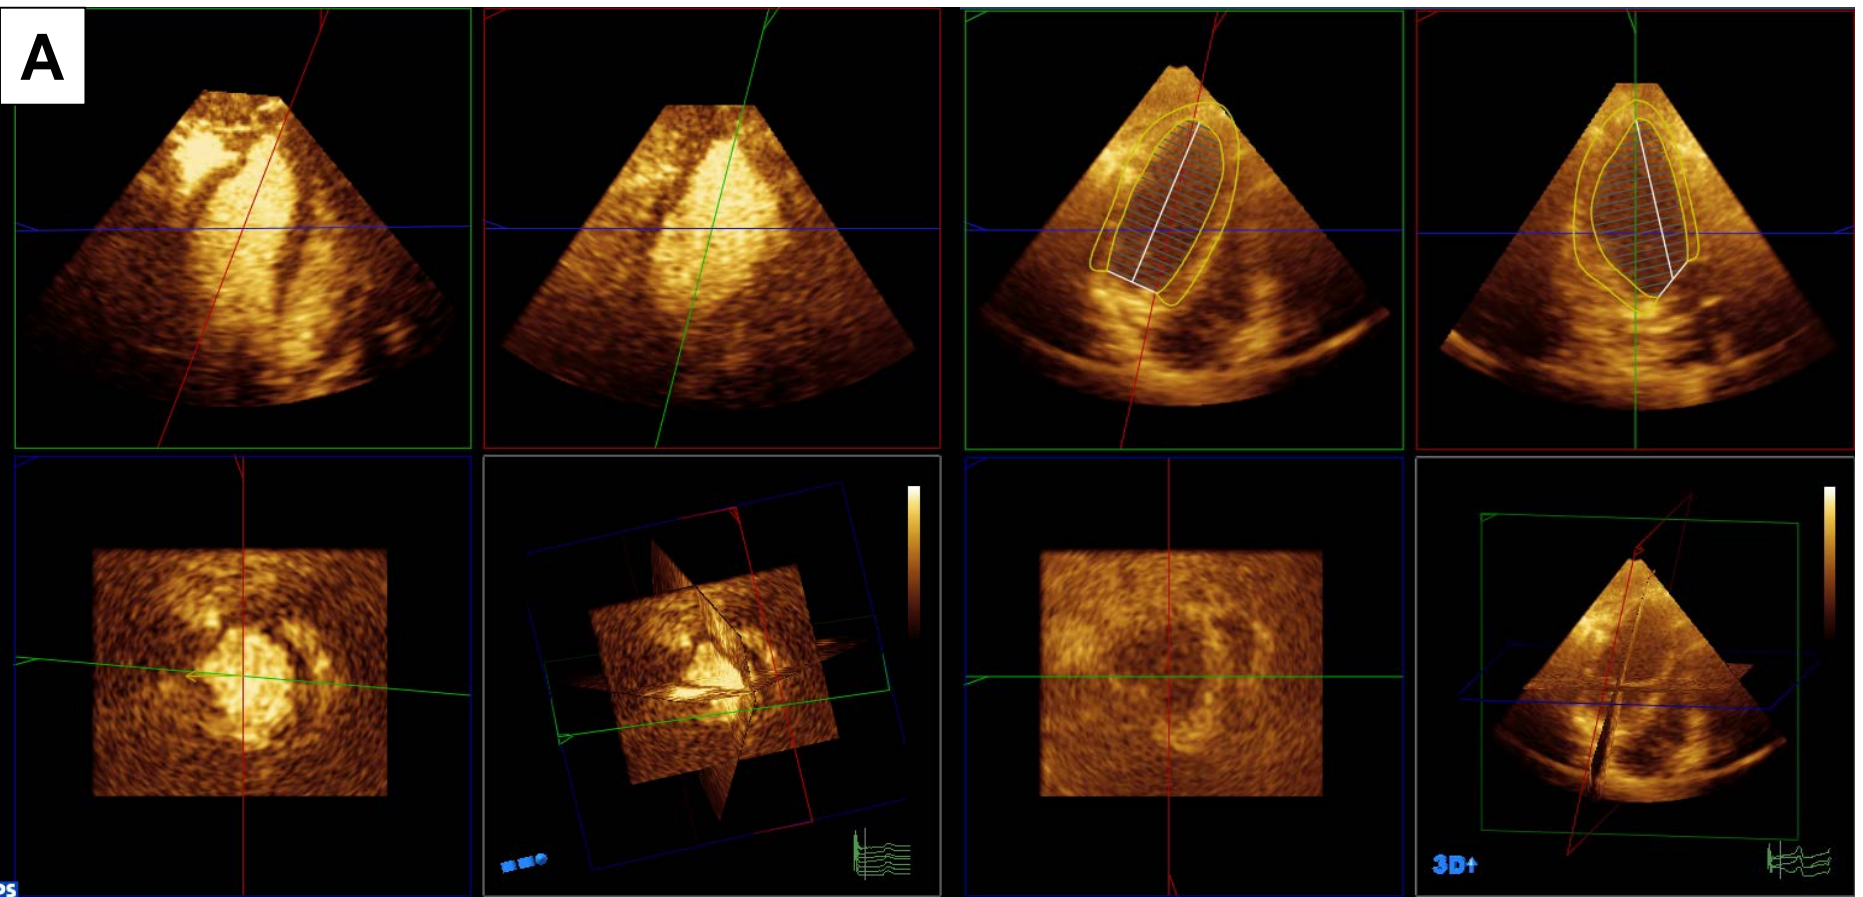

Supplement Figure 1

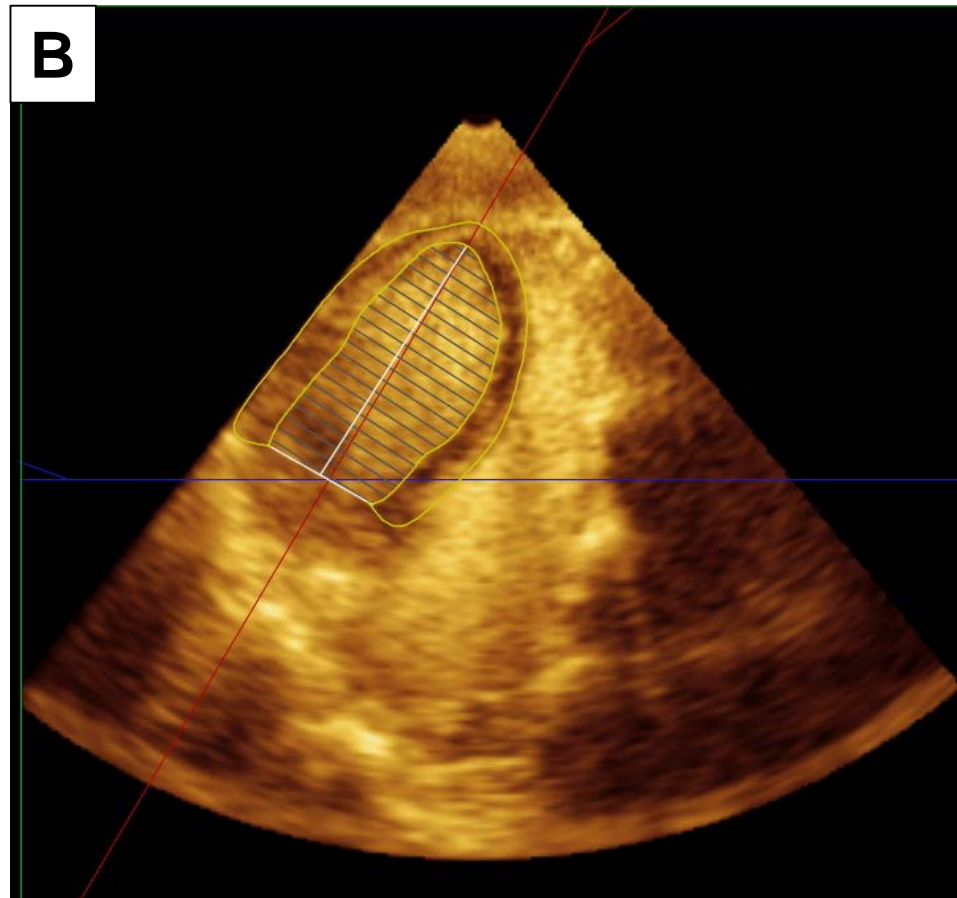

Supplement Figure 1

**C**

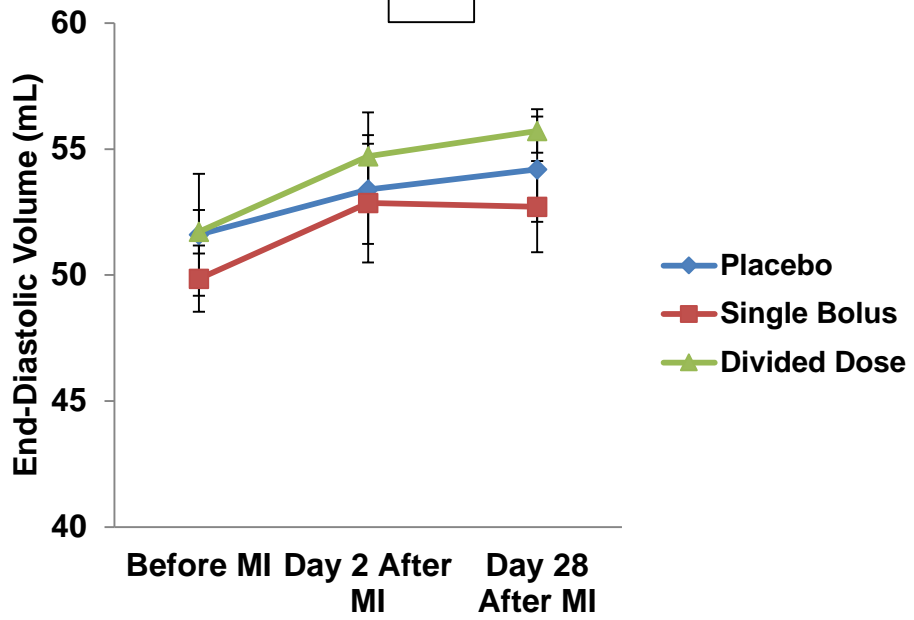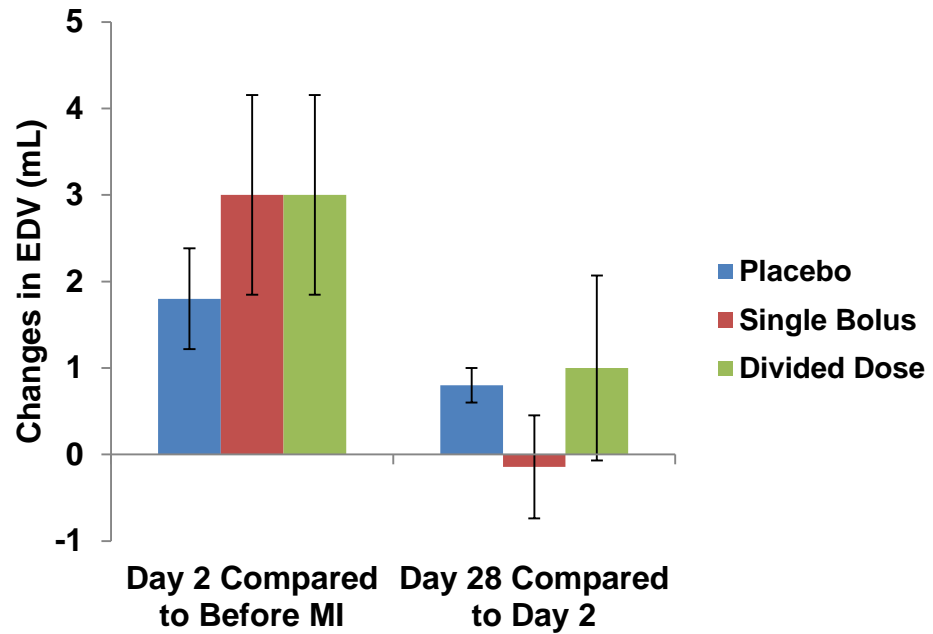

**D**

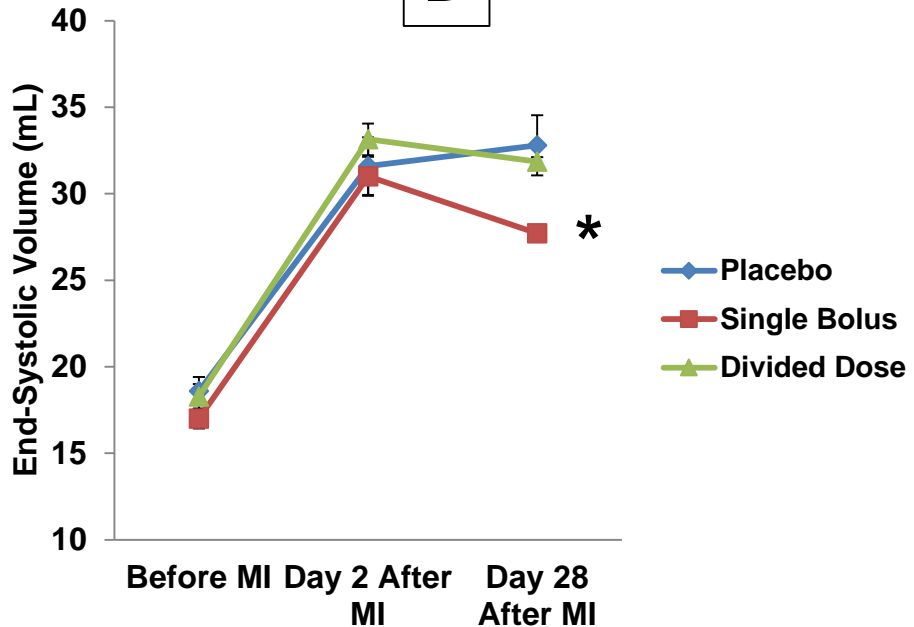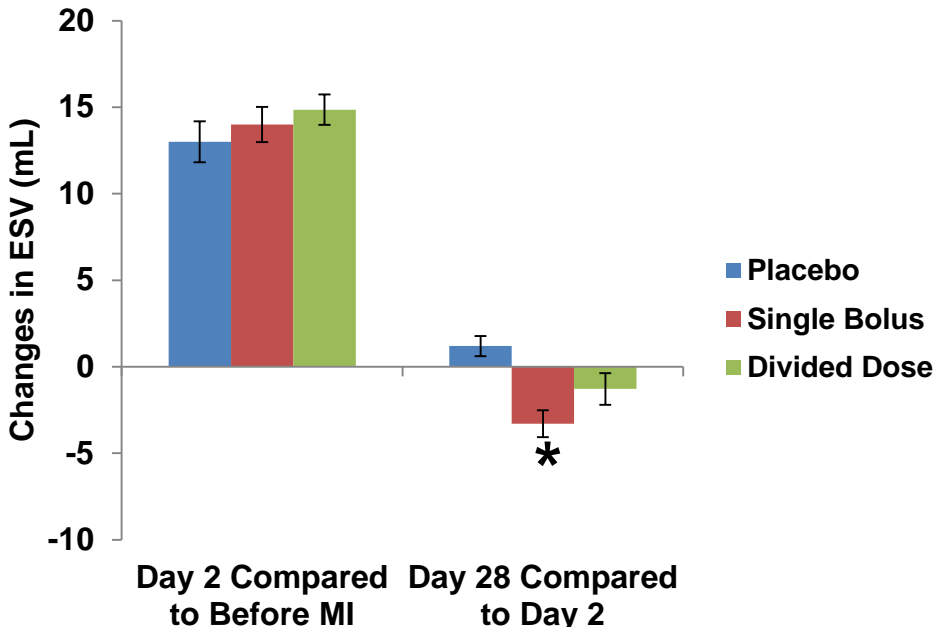

Supplement Figure 1

E

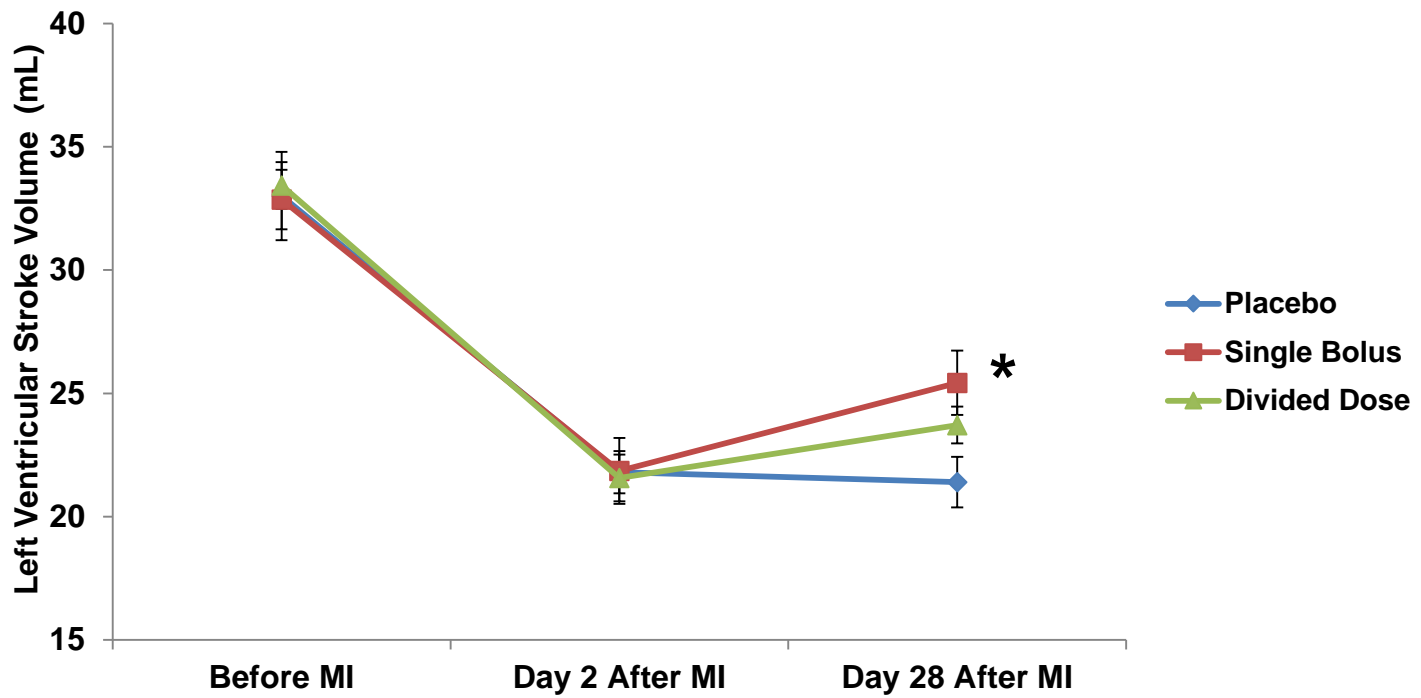

Supplement Figure 2

A

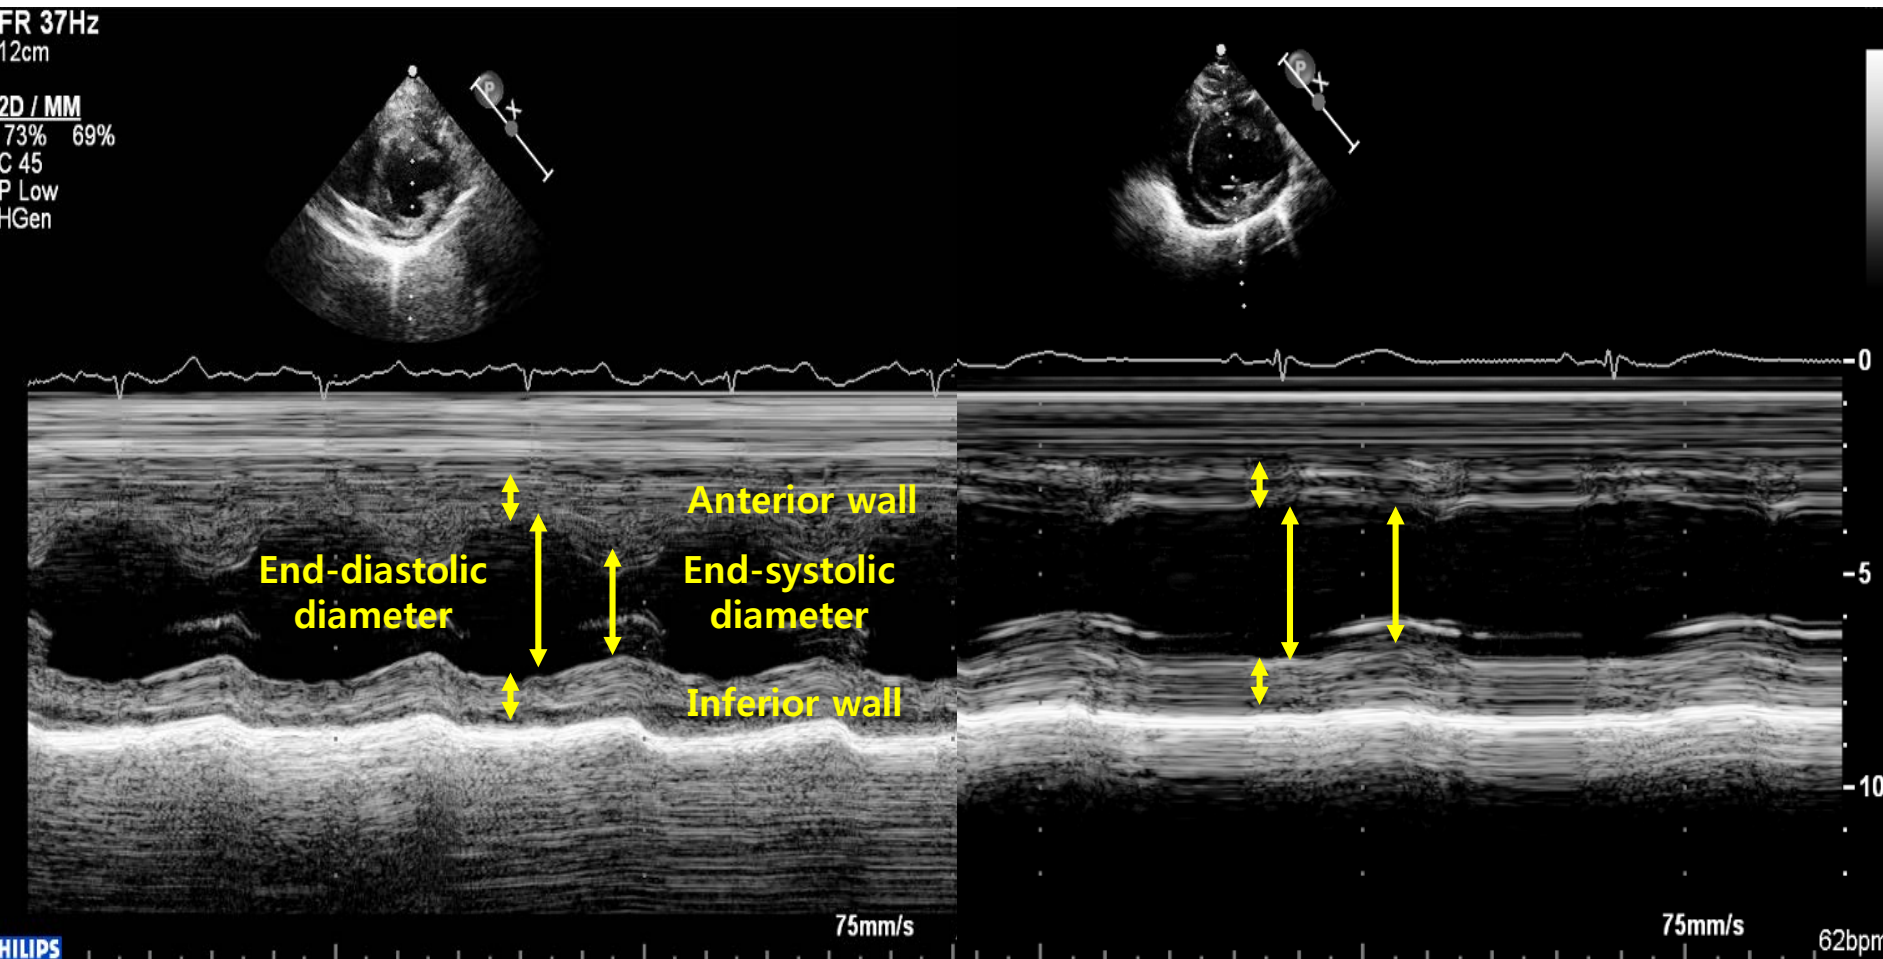

Before MI

After MI

Supplement Figure 2

**B**

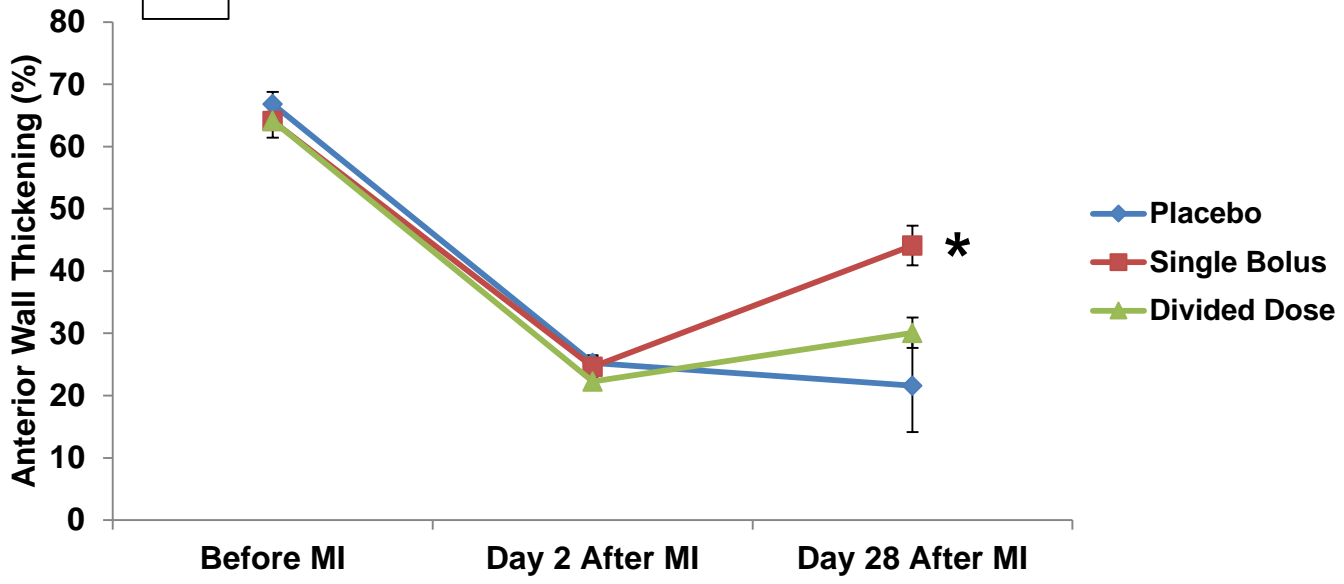

**C**

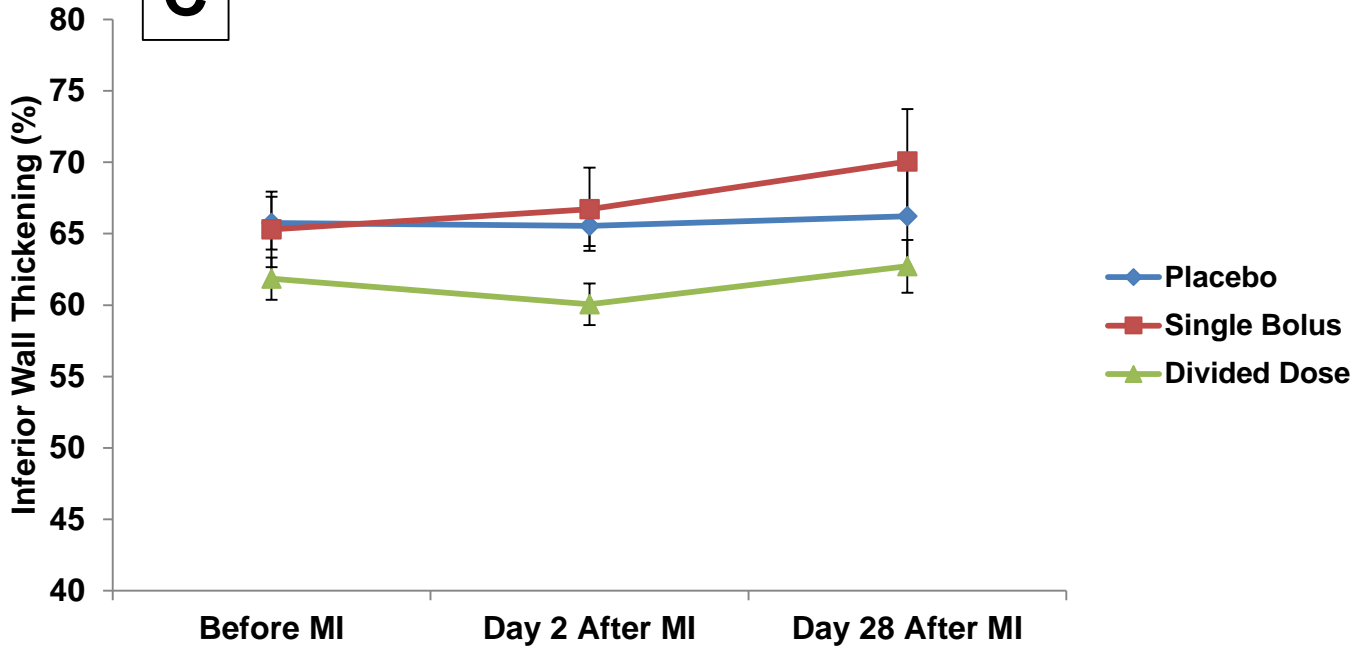

Supplement Figure 2

D

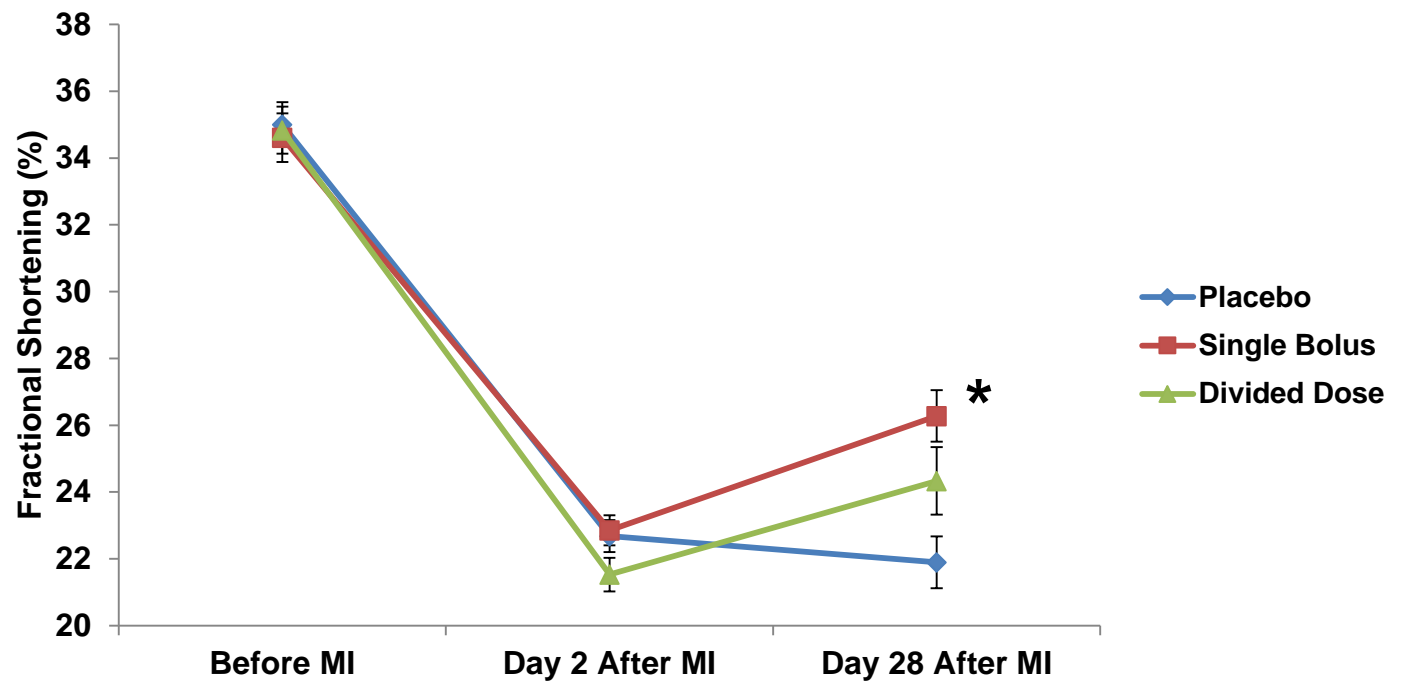



Supplement Figure 2

**E**

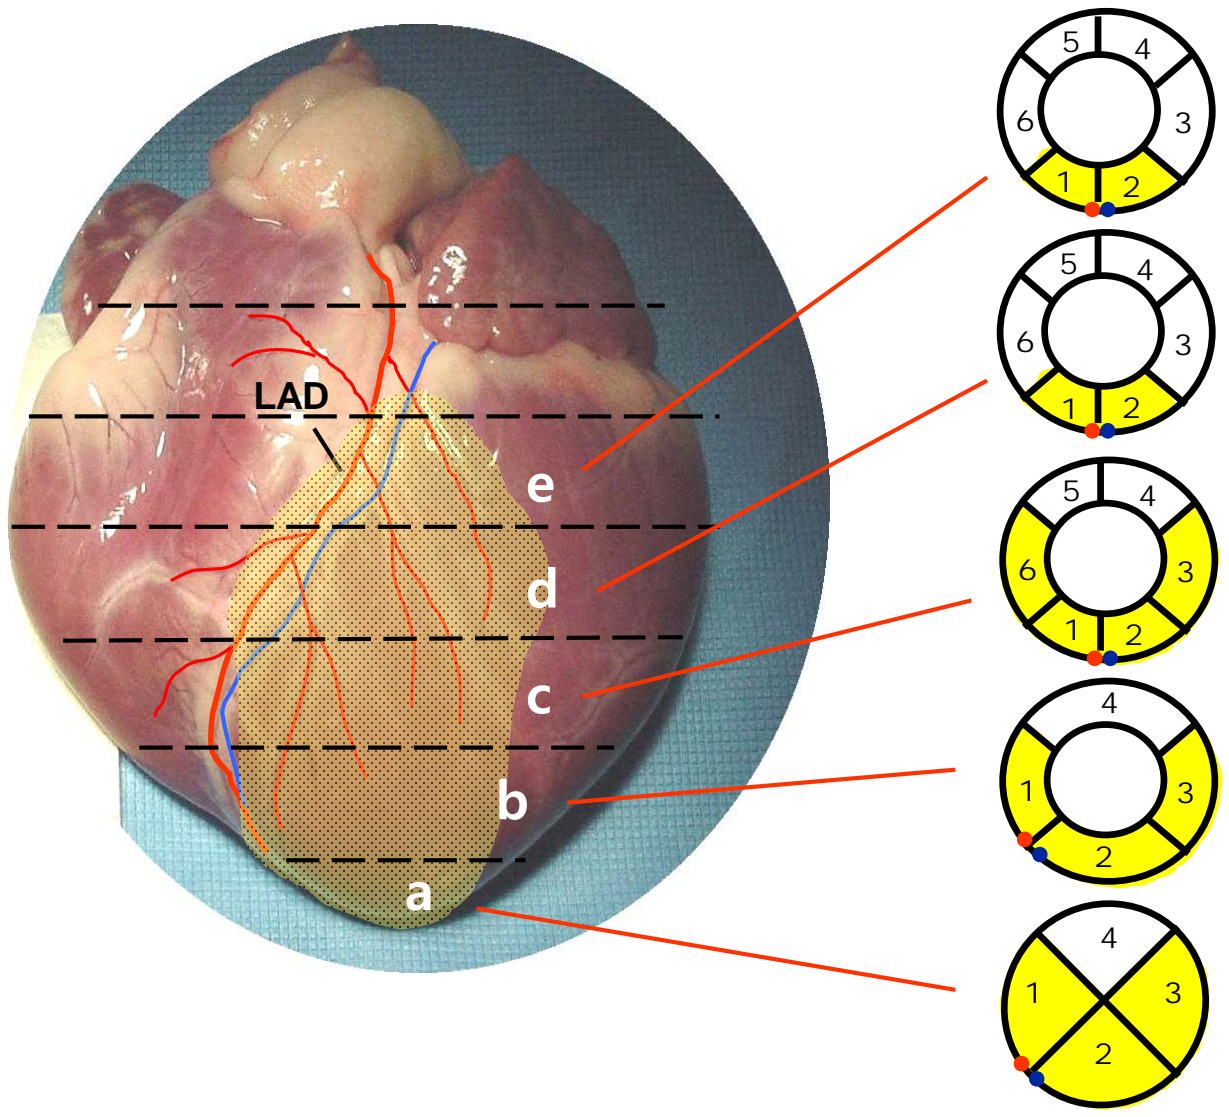



Supplement Figure 2

F

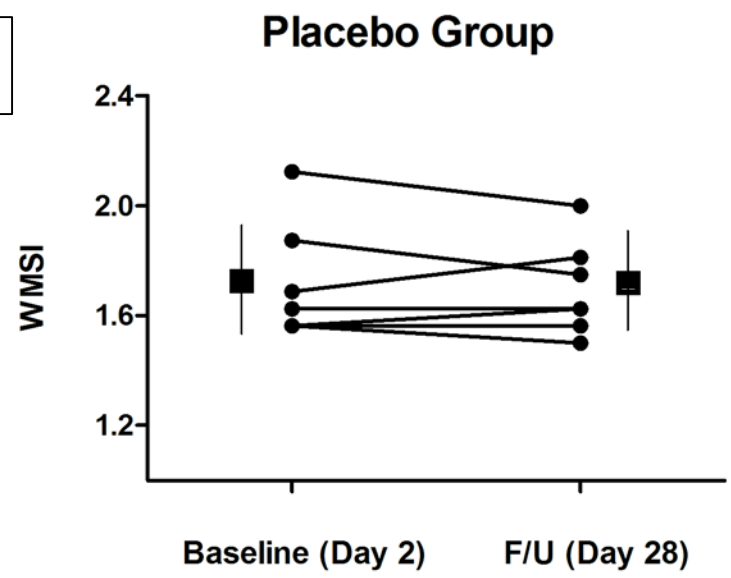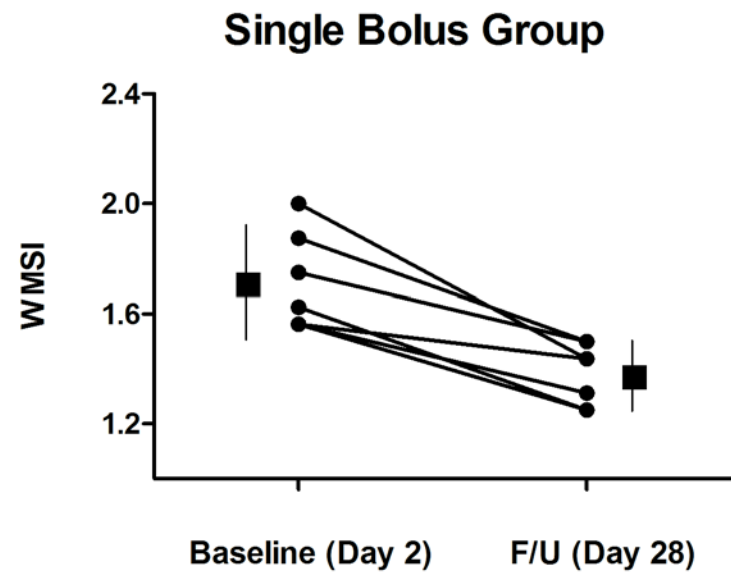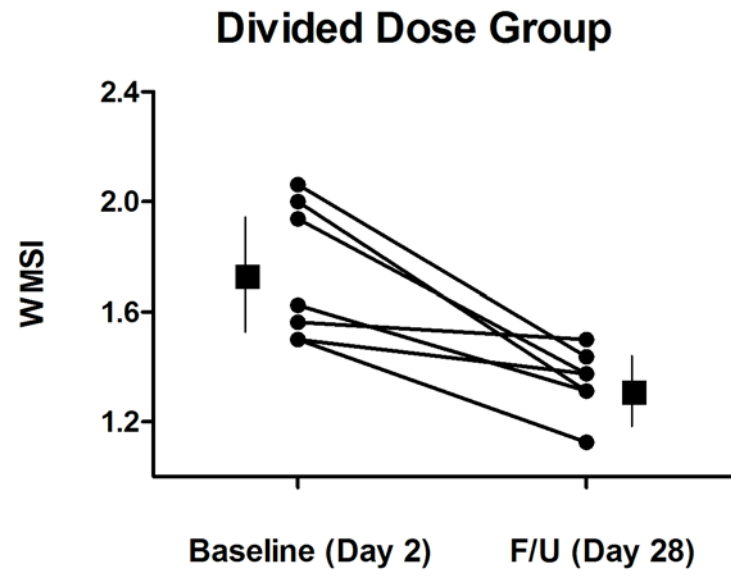

A

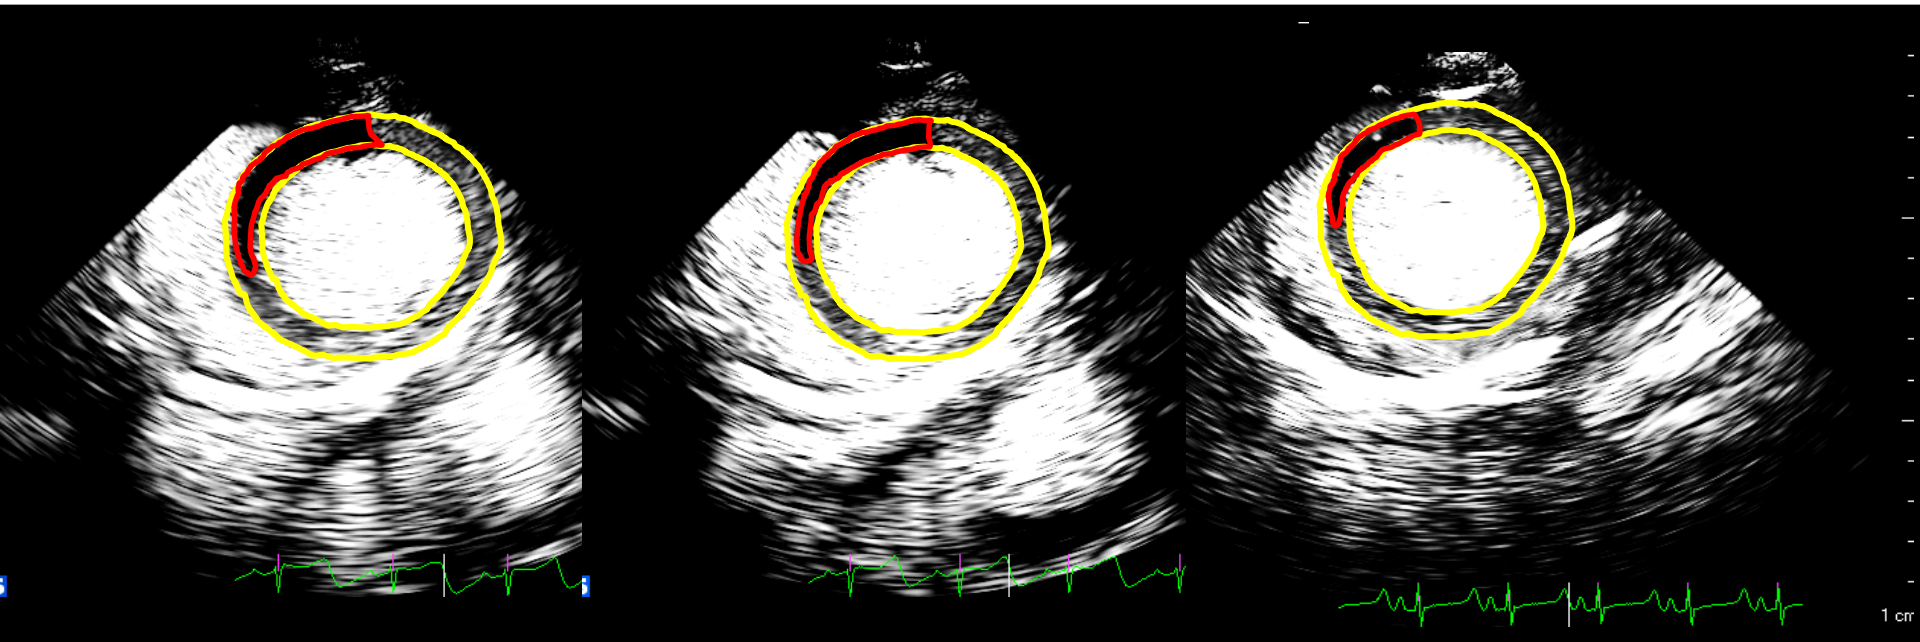

Supplement Figure 3

B

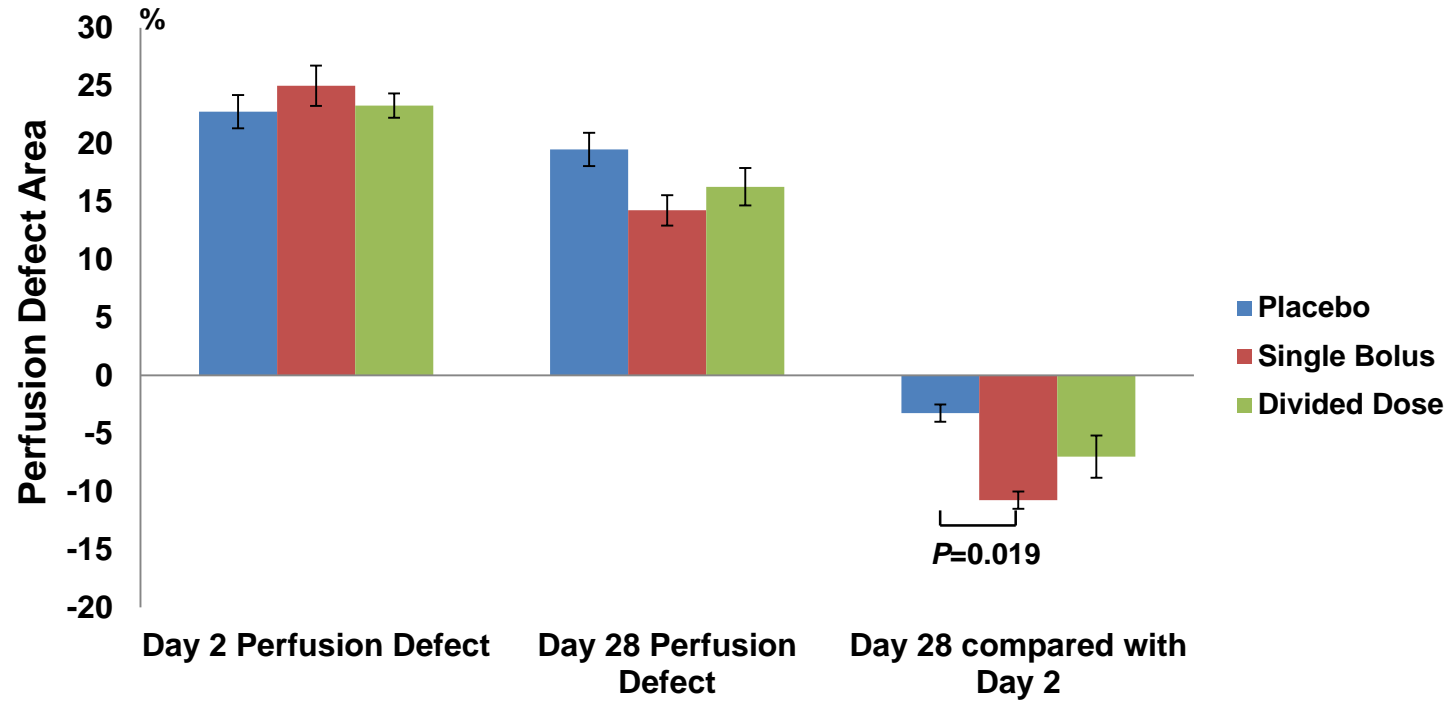

C

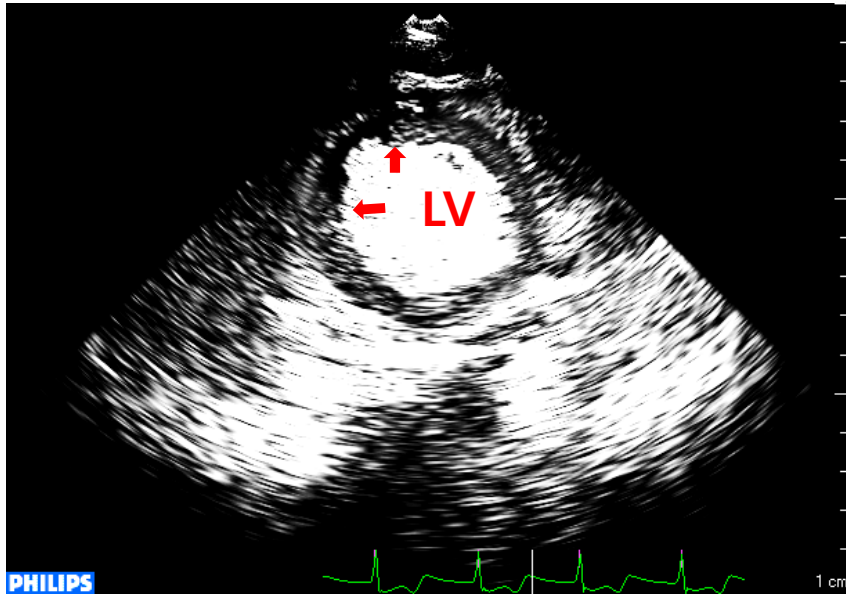

Day 28 MCE just before sacrifice

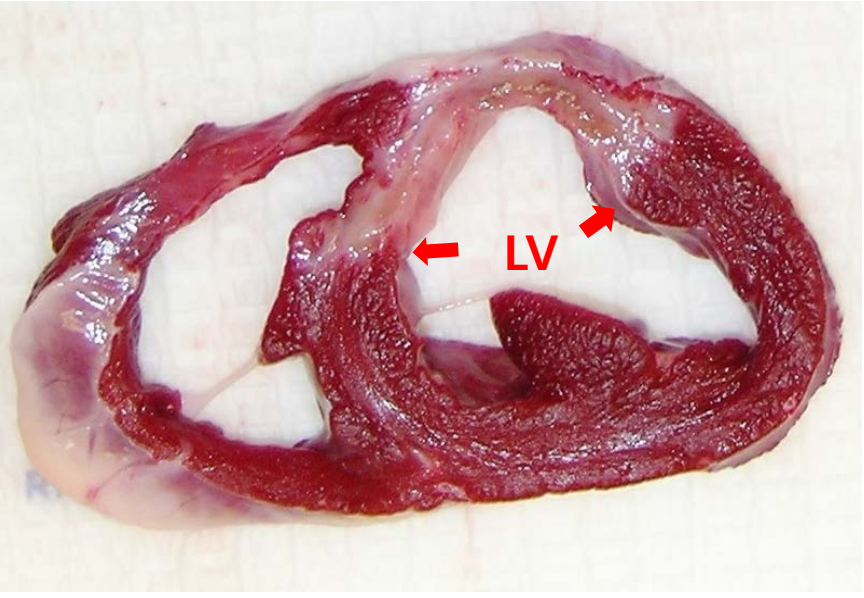

After sacrifice TTC staining

D

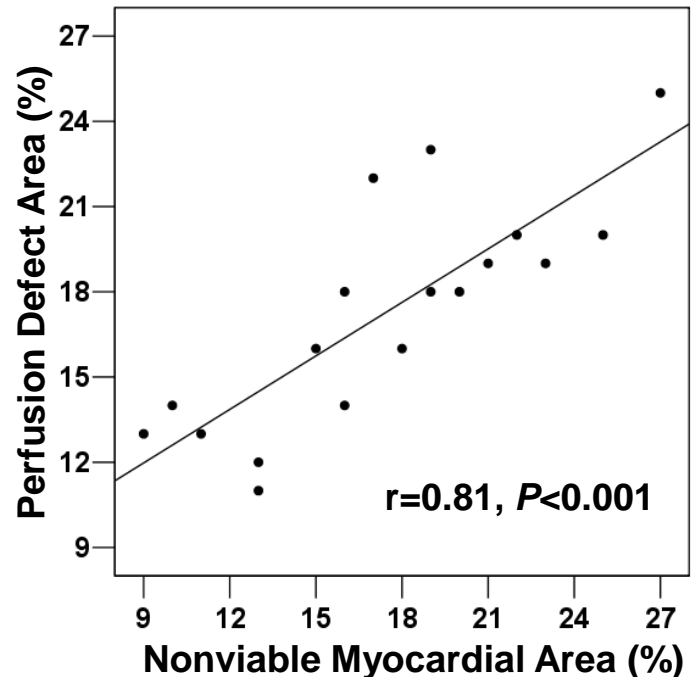

Supplement Figure 4

**A**

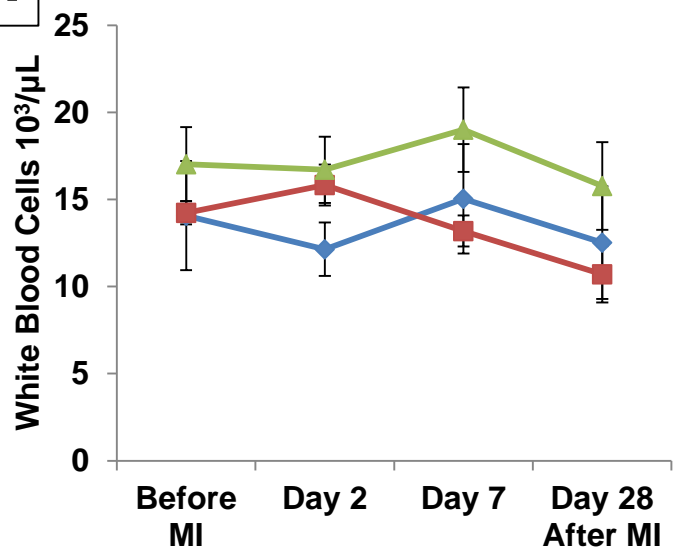

**B**

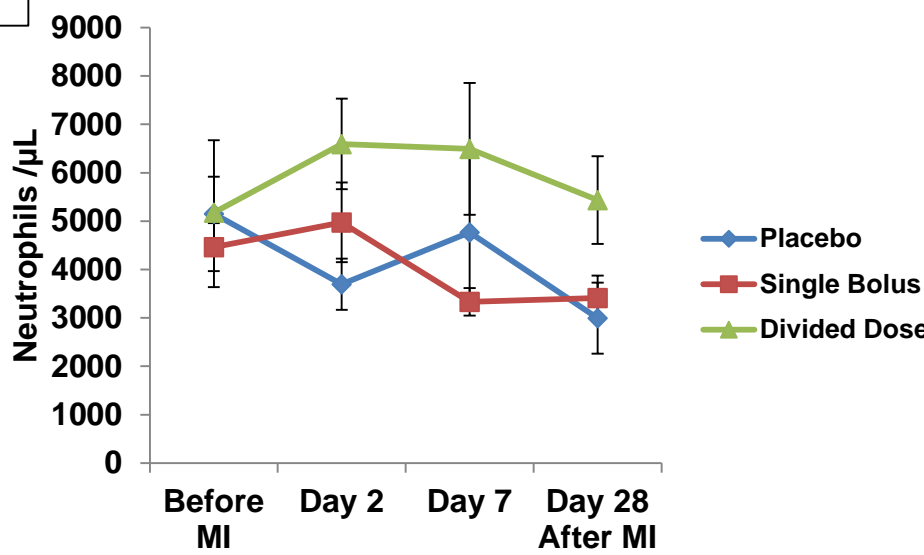

**C**

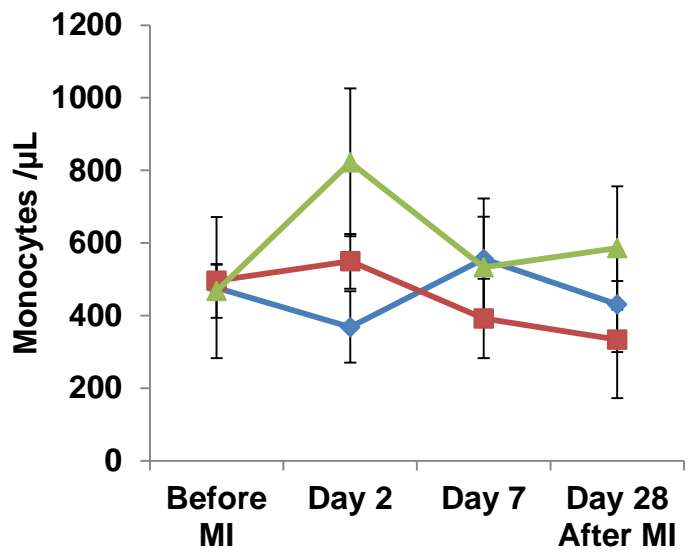

**D**

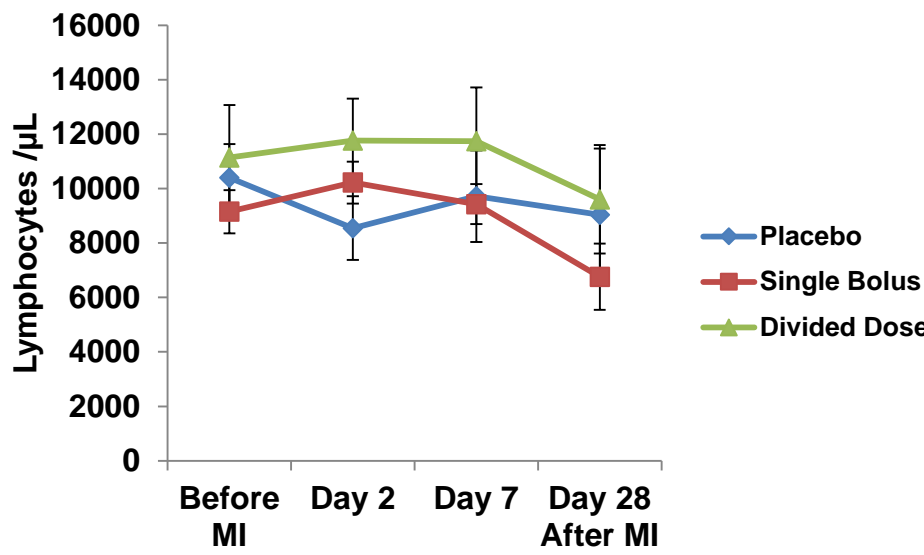

Supplement Figure 4

**E**

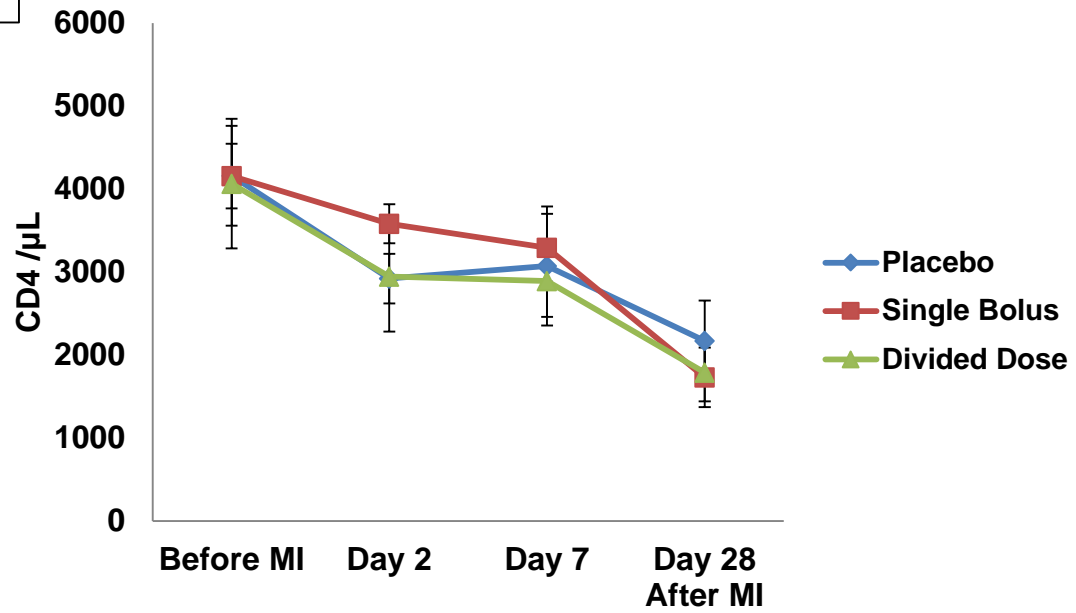

**F**

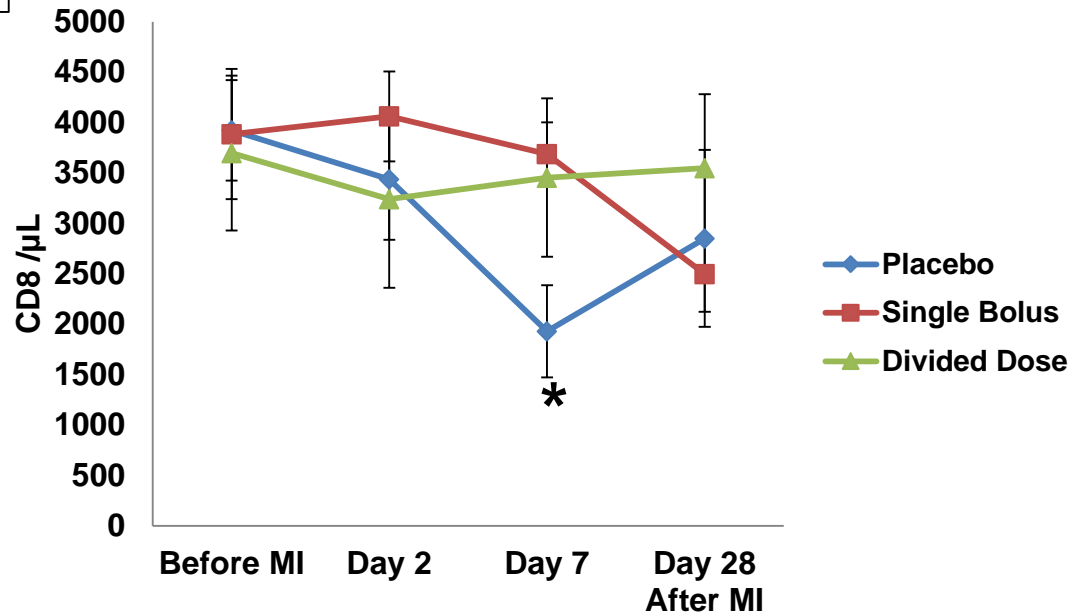



Supplement Figure 5

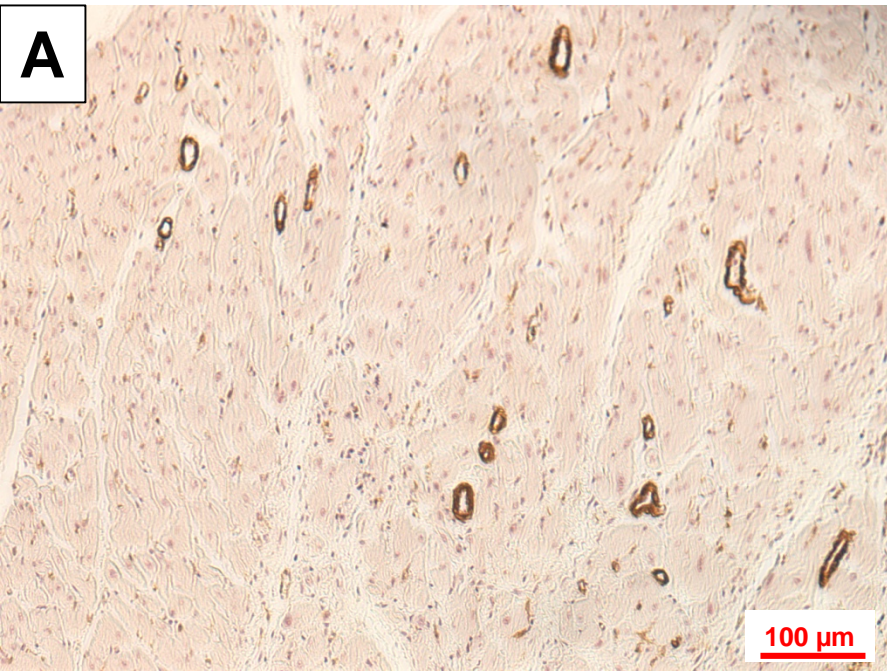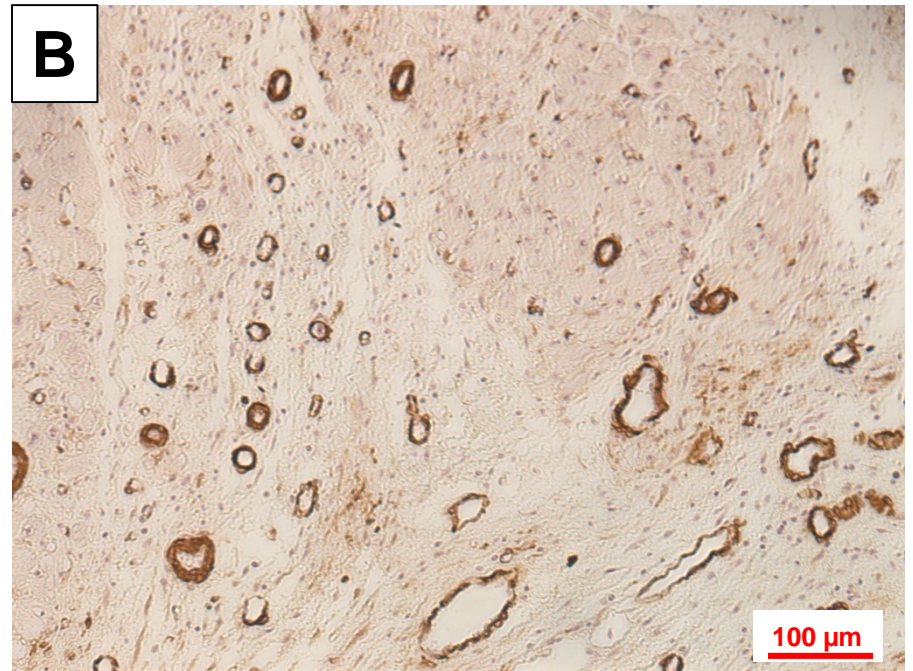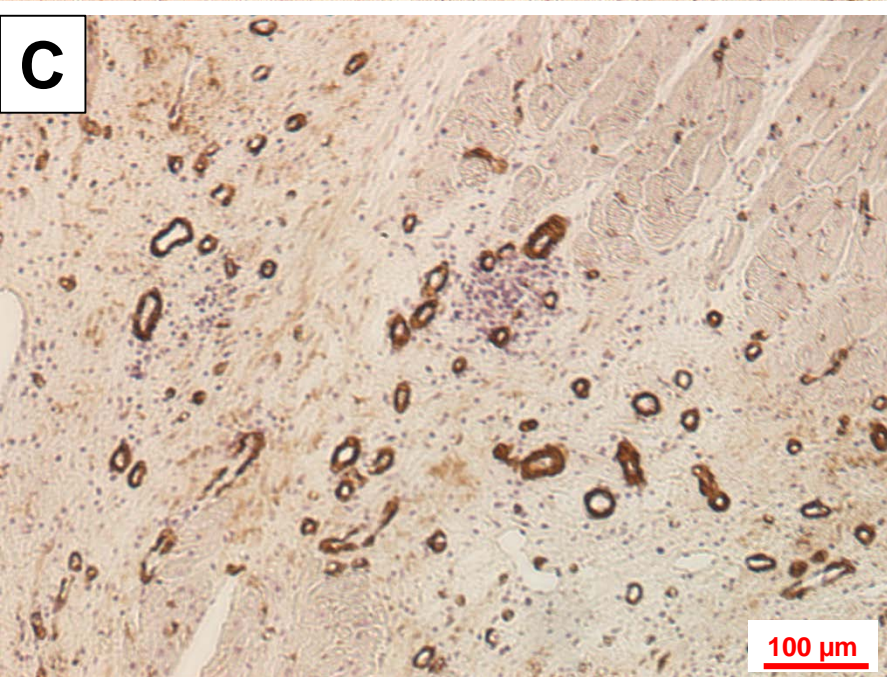



Supplement Figure 5

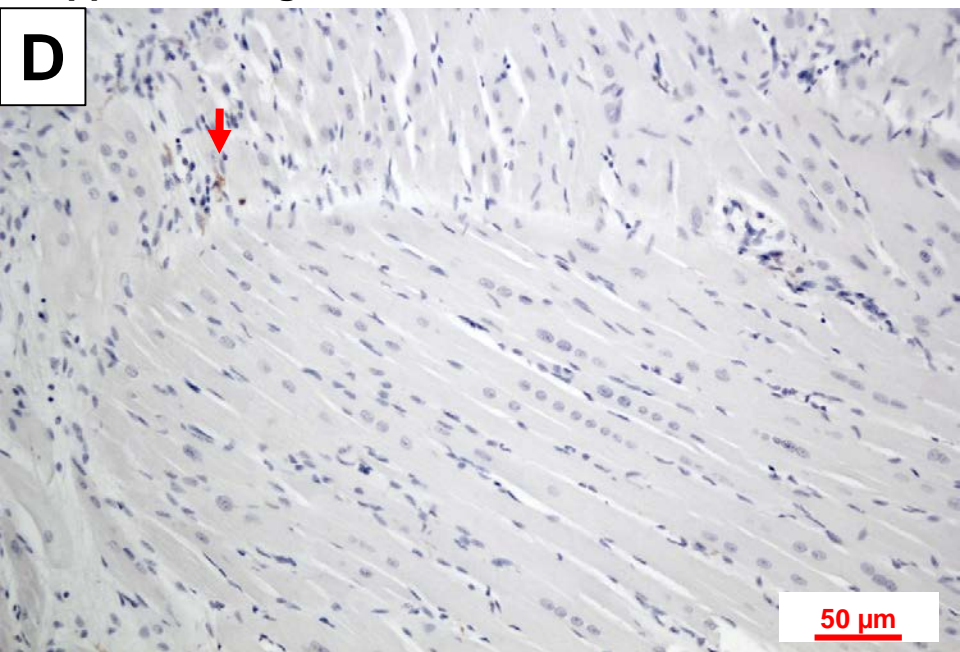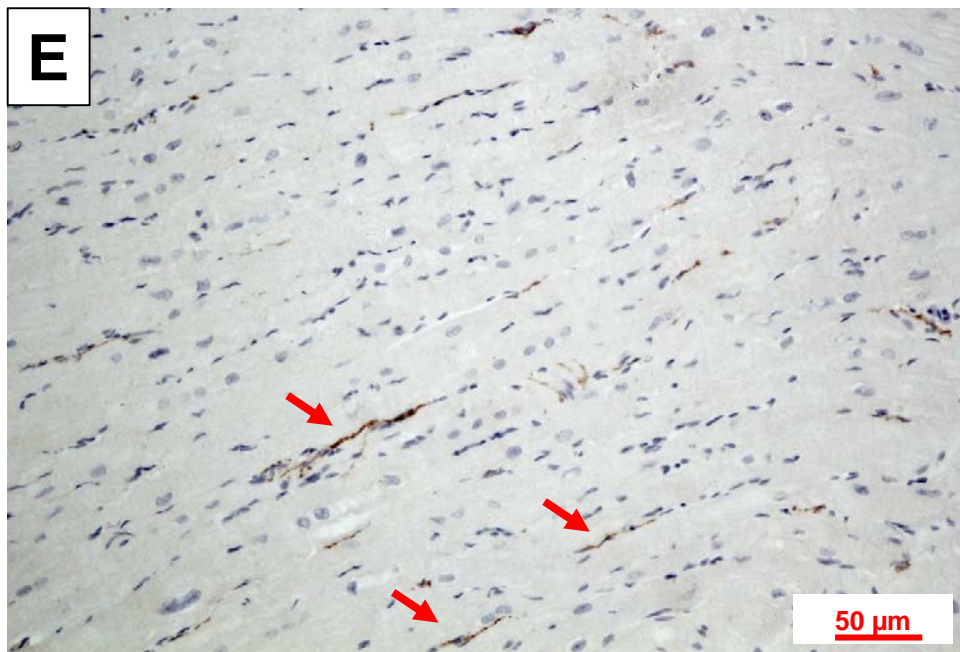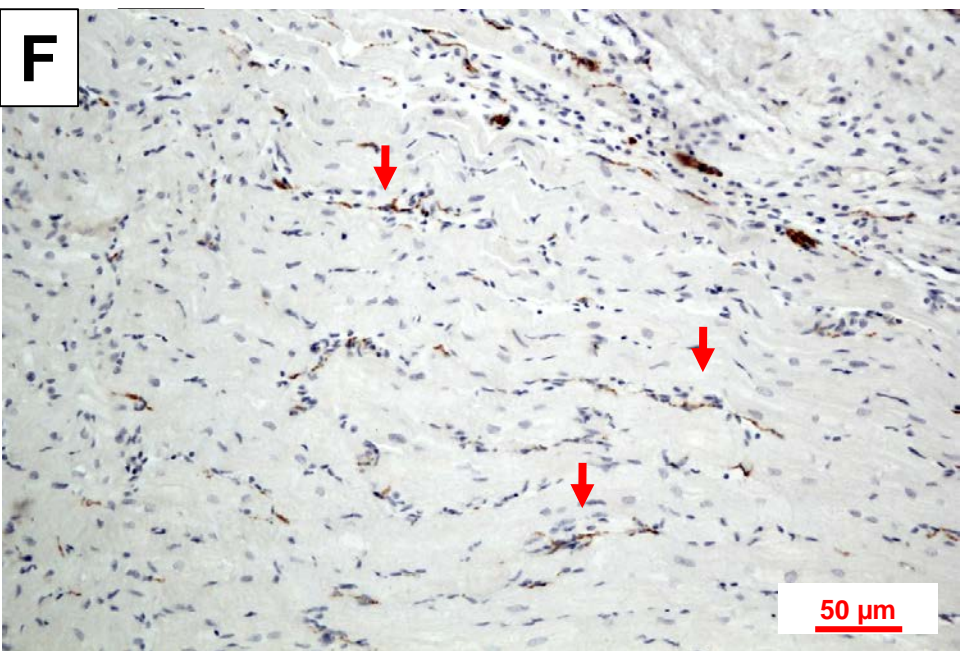



Supplement Figure 5

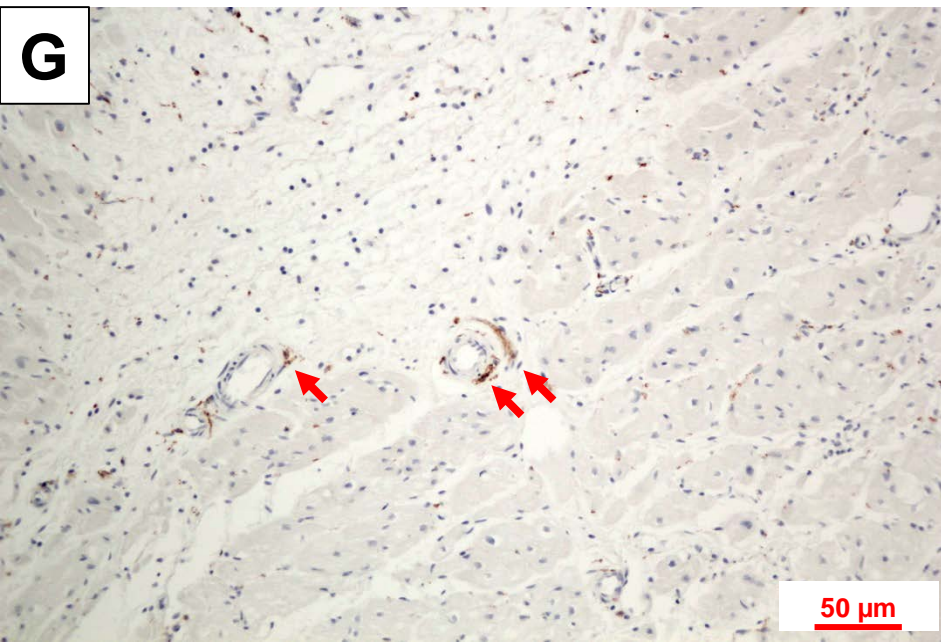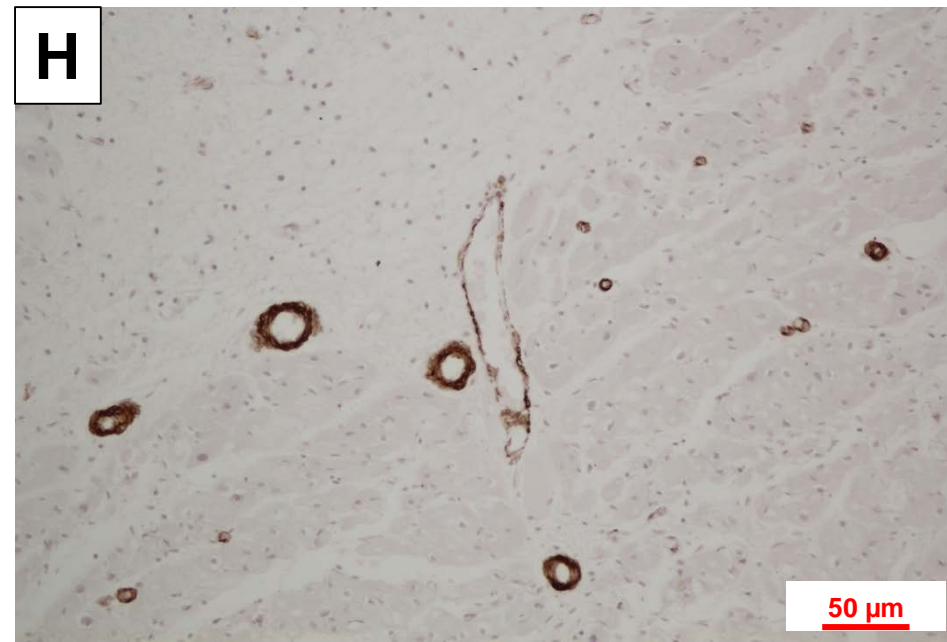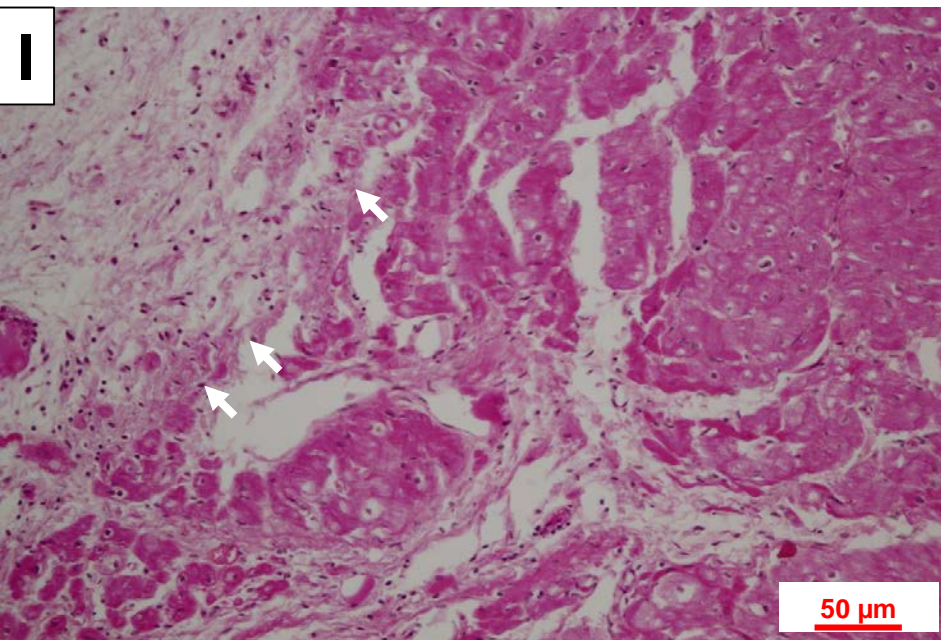

Supplement Figure 6

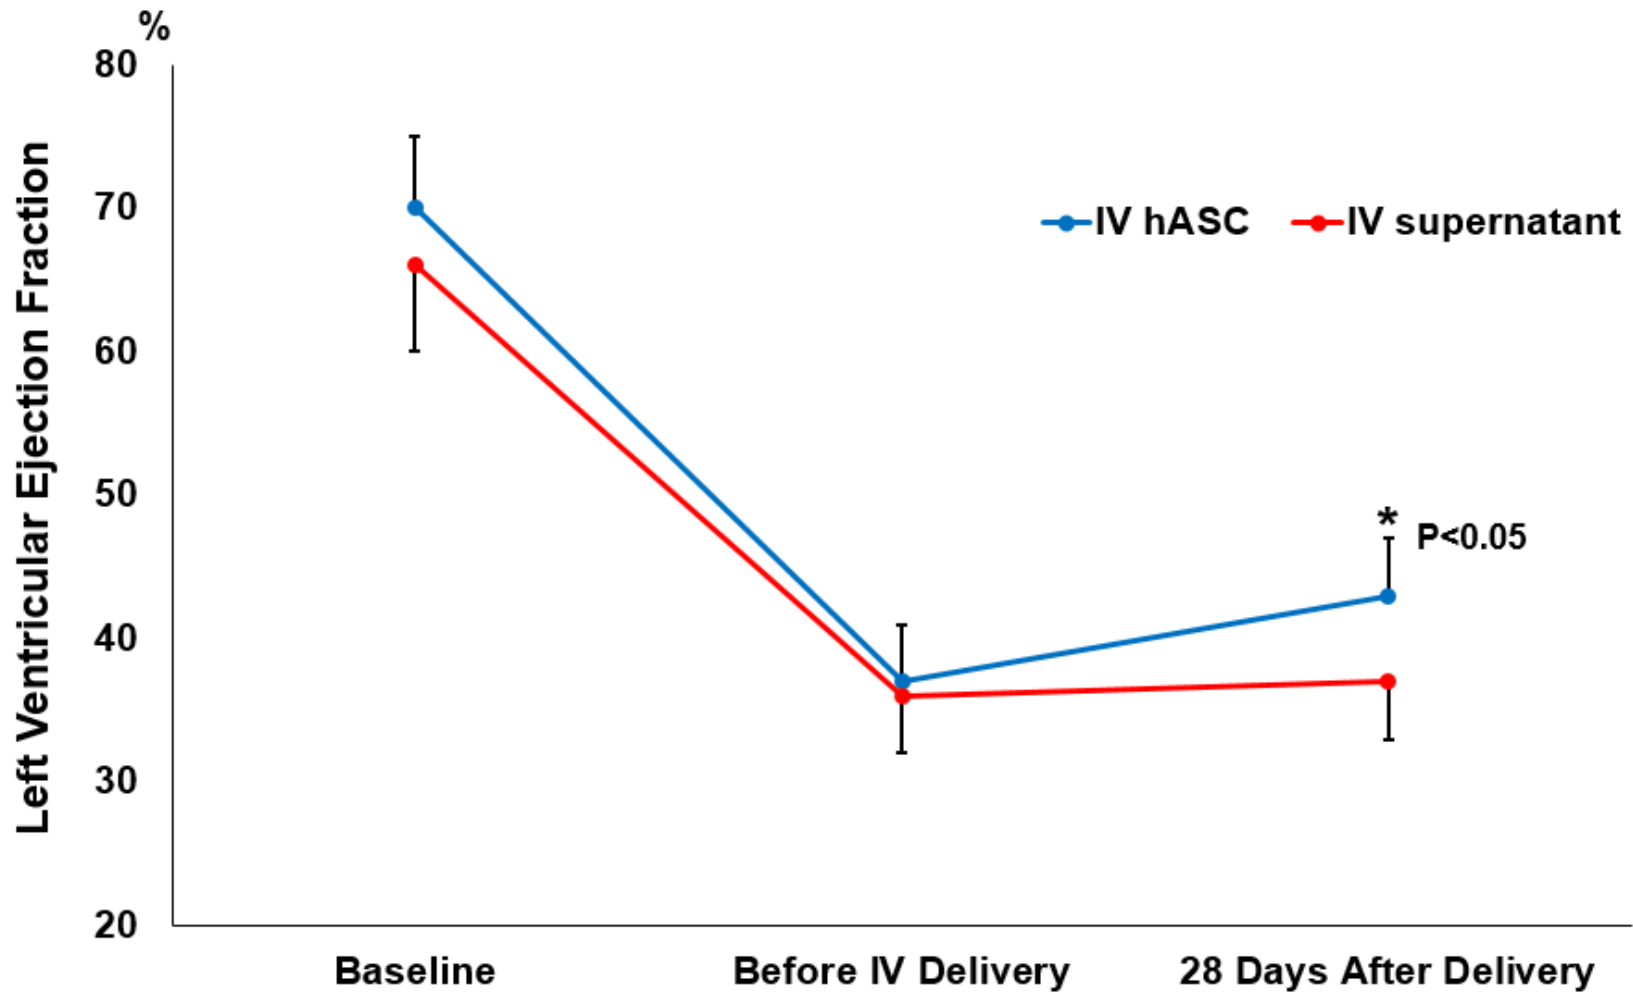

Supplement: NIHMS602489-supplement-Supp_FigureS1-S18.pdf [file NIHMS602489-supplement-Supp_FigureS1-S18.pdf]
